# Supplementary material
Source: Springer Nature journal article supplement (https://www.springermedizin.de/resource/supplementary/13075_2012_4043_MOESM1_ESM.pdf/9695926)
Supplement: MOESM1 [file 9695926]

**Study 06-008**  
Assessed for Eligibility: *n* = 1853

|                  | SXB        | PBO       | Total      |
|------------------|------------|-----------|------------|
| Randomized       | 365        | 183       | 548        |
| Discontinued     | 142<br>39% | 72<br>39% | 214<br>39% |
| Adverse Events   | 21%        | 11%       | 18%        |
| Lack of Efficacy | 7%         | 16%       | 10%        |
| Withdrew Consent | 7%         | 6%        | 7%         |
| Other            | 4%         | 6%        | 5%         |

|           |            |            |            |
|-----------|------------|------------|------------|
| Completed | 223<br>61% | 111<br>61% | 334<br>61% |
|-----------|------------|------------|------------|

|                     |            |           |            |
|---------------------|------------|-----------|------------|
| Enrolled in 06-010* | 183<br>82% | 86<br>77% | 269<br>81% |
|---------------------|------------|-----------|------------|

**Study 06-009**  
Assessed for Eligibility: *n* = 1544

|                  | SXB        | PBO       | Total      |
|------------------|------------|-----------|------------|
| Randomized       | 385        | 188       | 573        |
| Discontinued     | 140<br>36% | 57<br>30% | 197<br>34% |
| Adverse Events   | 18%        | 6%        | 14%        |
| Lack of Efficacy | 10%        | 12%       | 10%        |
| Withdrew Consent | 3%         | 3%        | 3%         |
| Other            | 5%         | 9%        | 6%         |

|           |            |            |            |
|-----------|------------|------------|------------|
| Completed | 245<br>64% | 131<br>70% | 376<br>66% |
|-----------|------------|------------|------------|

|                     |            |            |            |
|---------------------|------------|------------|------------|
| Enrolled in 06-010* | 191<br>78% | 101<br>77% | 292<br>78% |
|---------------------|------------|------------|------------|

**Study 06-010**  
Assessed for Eligibility\*: *n* = 561 (79%)

|         | Prior Study Treatment |     |           |
|---------|-----------------------|-----|-----------|
|         | SXB                   | PBO | Total*    |
| Treated | 374                   | 186 | 560 (79%) |

|                              | Prior Study Treatment |           |            |
|------------------------------|-----------------------|-----------|------------|
|                              | SXB                   | PBO       | Total      |
| Discontinued                 | 150<br>40%            | 91<br>49% | 241<br>43% |
| Adverse Events               | 21%                   | 27%       | 23%        |
| Lack of Efficacy             | 6%                    | 9%        | 7%         |
| Withdrew Consent             | 7%                    | 6%        | 6%         |
| Lost to Follow-up            | 3%                    | 2%        | 3%         |
| Investigator Decision        | 2%                    | 1%        | 1%         |
| Protocol Deviation/Violation | 1%                    | 1%        | 1%         |
| Other                        | 1%                    | 1%        | 1%         |
| Sponsor Decision             | 0%                    | 2%        | 1%         |

|           | Prior Study Treatment |           |            |
|-----------|-----------------------|-----------|------------|
|           | SXB                   | PBO       | Total      |
| Completed | 224<br>60%            | 95<br>51% | 319<br>57% |
